# Supplementary material for: A Multi-Country Analysis of Prevalence of Anxiety-Induced Sleep Disturbance and Its Associated Factors among In-School Adolescents in Sub-Saharan Africa Using the Global School-Based Health Survey
Source: MDPI journal article supplement (doi:10.3390/healthcare9020234), 2021-02-22
Supplement: s1 [file s1]

**Table 1. Study variables.**

| <b>Variables</b>                              | <b>Question</b>                                                                                                       | <b>Response options and recoding</b>                                                                 |
|-----------------------------------------------|-----------------------------------------------------------------------------------------------------------------------|------------------------------------------------------------------------------------------------------|
| <b>Outcome variable</b>                       |                                                                                                                       |                                                                                                      |
| Anxiety-induced sleep disturbance             | During the past 12 months, how often have you been so worried about something that you could not sleep at night?      | 1 = never to 5 = always (coded 1 - 3 = 0, 4 - 5 = 1)                                                 |
| <b>Explanatory variables</b>                  |                                                                                                                       |                                                                                                      |
| Socio-demographic characteristics             |                                                                                                                       |                                                                                                      |
| Age                                           | How old are you?                                                                                                      | 1=12, 2=13, 3=14, 4=15, 5=16, 6=17, 7=18 years (coded as 0=1-14, 15-19)                              |
| Sex                                           | What is your sex?                                                                                                     | 1=male, 2=female (coded 2=0, 1=1)                                                                    |
| Psychosocial environmental factors            |                                                                                                                       |                                                                                                      |
| Marijuana use                                 | During the past 30 days, how many times have you used marijuana (Country specific examples)                           | 1=0 times; to 5=20 or more times (coded as 1=0; and 2-5=1)                                           |
| Loneliness                                    | During the past 12 months, how often have you felt lonely?                                                            | 1=never, 2=rarely, 3= sometimes, 4 = most of the time to 5 = always (coded as 1-3 = 0; and 4- 5 = 1) |
| Truancy                                       | During the past 30 days, on how many days did you miss classes or school without permission?                          | 1=0 days,2= 1or 2 days, 3=3 to 5 days, 4=6 to 9 days, 5= 10 or more (coded as 1=0; and 2-5=1)        |
| Suicidal ideation                             | During the past 12 months, did you ever seriously consider attempting suicide?"                                       | 1 = yes, 2 = no (coded 2 = 0; and 1 = 1)                                                             |
| Suicidal attempt                              | During the past 12 months, how many times did you actually attempt suicide?                                           | 1=0 times; to 5= 6 or more times (coded as 1=0; and 2-5=1)                                           |
| Suicidal plan                                 | During the past 12 months, did you make a plan about how you would attempt suicide?                                   | 1 = yes, 2 = no (coded 2 = 0; and 1 = 1)                                                             |
| Bullied                                       | During the past 30 days, how were you bullied most often?                                                             | 1 = 0 times; to 8 = 12 or more times (coded as 1 = 0; and 2-7 = 1)                                   |
| Close friends                                 | How many close friends do you have?                                                                                   | 1=0 to 4=3 or more (coded as 1=0; and 2-4=1)                                                         |
| Helpful (Peer support)                        | During the past 30 days, how often were most of the students in your school kind and helpful?                         | 1=never, 2=Rarely, 3=sometimes, 4=most of the times, 5=always (coded as 1-3 = 0; and 4-5 = 1)        |
| Parents check homework (parental supervision) | During the past 30 days, how often did your parents or guardians check to see if your homework was done?              | 1=never, 2=Rarely, 3=sometimes, 4=most of the times, 5=always (coded as 1-3 = 0; and 4-5 = 1)        |
| Understand problems (Parental Connectedness)  | During the past 30 days, how often did your parents or guardians understand your problems and worries?                | 1=never, 2=Rarely, 3=sometimes, 4=most of the times, 5=always (coded as 1-3 = 0; and 4-5 = 1)        |
| Know what adolescent do free                  | During the past 30 days, how often did your parents or guardians really know what you were doing with your free time? | 1=never, 2=Rarely, 3=sometimes, 4=most of the times, 5=always (coded as 1-3= 0; and 4-5 = 1)         |

|                                     |  |  |
|-------------------------------------|--|--|
| time (Parental or guardian Bonding) |  |  |
|-------------------------------------|--|--|
